# Supplementary material for: Iodide ions as invisible chemical scissors tailoring carbon nitride for highly efficient photocatalytic H2O2 evolution
Source: Royal Society of Chemistry journal article supplement (doi:10.1039/d2cy01135b), 2022-01-01
Supplement: d2cy01135b1.pdf [file d2cy01135b1.pdf]

## Supporting Information

### **Iodide ions as invisible chemical scissors tailoring carbon nitride for highly-efficient photocatalytic H<sub>2</sub>O<sub>2</sub> evolution**

Dawei Yu†, Weiran Gong†, Xinyu Zhi†, Yang Wu, Xin Gao, Huinan Che\*, Yanhui Ao

*Key Laboratory of Integrated Regulation and Resource Development on Shallow Lakes, Ministry of Education, College of Environment, Hohai University, No.1, Xikang road, Nanjing, 210098, China*

*†These authors contributed equally to this work.*

*\*Corresponding author. E-mail: chehuinan@hhu.edu.cn (H. Che)*

**Figure S1.** (a) Standard curves for different concentration of  $\text{H}_2\text{O}_2$  and (b) The linear relationship of concentration of  $\text{H}_2\text{O}_2$  vs. UV-vis absorption intensity.

**Figure S2.** XPS survey spectra of BCN, TCN, BCN/ $\text{NaI}_{0.4}$  and TCN/ $\text{NaI}_{0.4}$ .

**Figure S3.** XPS spectra I 3d for TCN/ $\text{NaI}_{0.4}$ .

**Figure S4.** (a-b) Typical AFM images and the height profile along the line in AFM of TCN/ $\text{NaI}_{0.4}$ .

**Figure S5.** Histogram of  $\text{H}_2\text{O}_2$  production for BCN, TCN, BCN/ $\text{NaI}_{0.4}$  and TCN/ $\text{NaI}_{0.4}$ .

**Figure S6.** Time profiles of  $\text{H}_2\text{O}_2$  production for TCN/ $\text{NaI}_{0.4}$ , TCN/ $\text{NaI}_{0.3}$ , TCN/ $\text{NaI}_{0.1}$  under visible light irradiation.

**Figure S7.** UV-vis absorption spectra of  $\text{H}_2\text{O}_2$  produced with IPA in photocatalytic stage of (a) BCN and (b) TCN at different times.

**Figure S8.** UV-vis absorption spectra of  $\text{H}_2\text{O}_2$  produced with IPA in photocatalytic stage of (a) BCN/ $\text{NaI}_{0.4}$  and (b) TCN/ $\text{NaI}_{0.4}$  at different times.

**Figure S9.** Photocatalytic  $\text{H}_2\text{O}_2$  production activity of TCN/ $\text{NaI}_{0.4}$  under different conditions.

**Figure S10.** Photocatalytic  $\text{H}_2\text{O}_2$  production activity of TCN/ $\text{NaI}_{0.4}$  under 420 nm, 500 nm, 550 nm light irradiation.

**Figure S11.** Histogram of  $\text{H}_2\text{O}_2$  production for TCN/ $\text{NaI}_{0.4}$  under 420 nm, 500 nm, 550 nm light irradiation.

**Figure S12.** Isosurface map of IRI of pure BCN and TCN/ $\text{NaI}$ .

**Figure S13.** Total density of states (DOS) and partial density of states (PDOS) of pure BCN and TCN/ $\text{NaI}$ .

**Figure S14.** Electronic structure of the optimized HOMO and LUMO of pure BCN. Green and blue isosurfaces represent electron and hole distributions, respectively. The isosurface value is  $0.003 \text{ e}/\text{\AA}^3$ .

**Figure S15.** Electronic structure of the optimized HOMO and LUMO of  $\text{O}_2$  adsorbed BCN. Green and blue isosurfaces represent electron and hole distributions, respectively. The isosurface value is  $0.003 \text{ e}/\text{\AA}^3$ .

**Figure S16.** Electronic structure of the optimized HOMO and LUMO of TCN/NaI. Green and blue isosurfaces represent electron and hole distributions, respectively. The isosurface value is  $0.003 \text{ e}/\text{\AA}^3$ .

**Figure S17.** Electronic structure of the optimized HOMO and LUMO of  $\text{O}_2$  adsorbed TCN/NaI. Green and blue isosurfaces represent electron and hole distributions, respectively. The isosurface value is  $0.003 \text{ e}/\text{\AA}^3$ .

## **Experimental sections**

### **Characterization**

In this experiment, in order to determine the microscopic morphology of the catalysts, scanning electron microscopy (SEM; S-4800, Hitachi, Japan) and transmission electron microscope (TEM; JEM-F200, JEOL, Japan) were put into effect. The powder X-ray diffraction (XRD; Rigaku, Japan) was used to analyze the crystalline phase structure of sample. Additionally, in order to further explore the chemical structure of the catalysts, the X-ray photoelectron spectroscopy (XPS; Thermo- Scientific K-Alpha+, USA) and fourier-transform infrared spectroscopy (FTIR; Tensor 27, Bruker Optics, German) were performed. By using the UV-Vis spectrophotometer (UV-3600, Shimadzu, Japan) with a reflectance standard BaSO<sub>4</sub> powder, UV-vis diffuse reflectance spectra (DRS) was obtained. Fluorescence spectrometer (F-7000, Hitachi, Japan) was used to carried out the photoluminescence (PL) spectroscopy with 370 nm excitation wavelength. Electron spin resonance (ESR) experiments were performed on the Bruker ESR JESFA200 spectrometer.

### **DFT calculation**

The geometry optimization and excited-state calculations was performed by PBE0-D3(BJ) exchange-correlation functional with the 6-311G(d) basis set based on Gaussian 16 C.01 code.<sup>1-6</sup> Frequency calculations were performed to ensure that the stability configuration has no imaginary frequency. The solvent effect of H<sub>2</sub>O was considered using self-consistent reaction field (SCRF) based on the solvation model density (SMD) implicit solvent model.<sup>7</sup> Frontier molecular orbital, Fukui function,<sup>8-10</sup> density of states (DOS), interaction region indicator (IRI),<sup>11</sup> hole-electron analysis<sup>12</sup> and interfragment charge transfer (IFCT) were calculated with Multiwfn 3.8(dev).<sup>13</sup> All structures and isosurfaces images were visualized by VMD 1.9.3.<sup>14</sup>

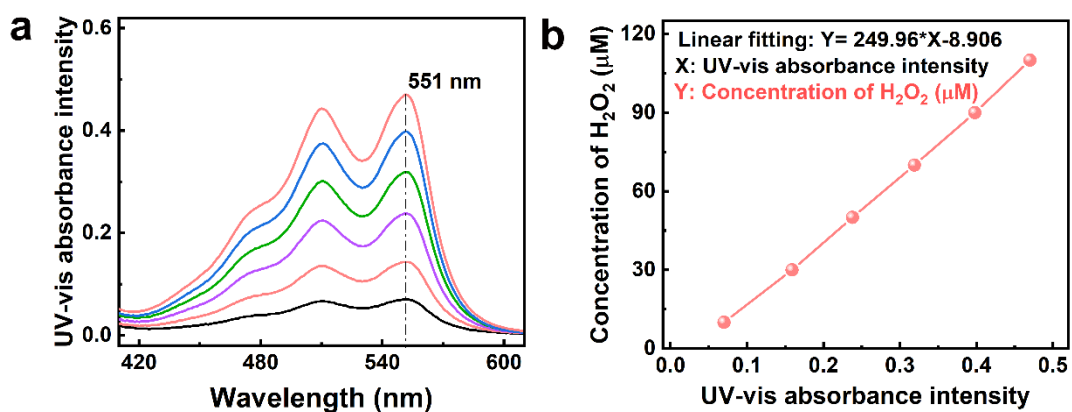

**Figure S1.** (a) Standard curves for different concentration of H<sub>2</sub>O<sub>2</sub> and (b) The linear relationship of concentration of H<sub>2</sub>O<sub>2</sub> vs. UV-vis absorption intensity.

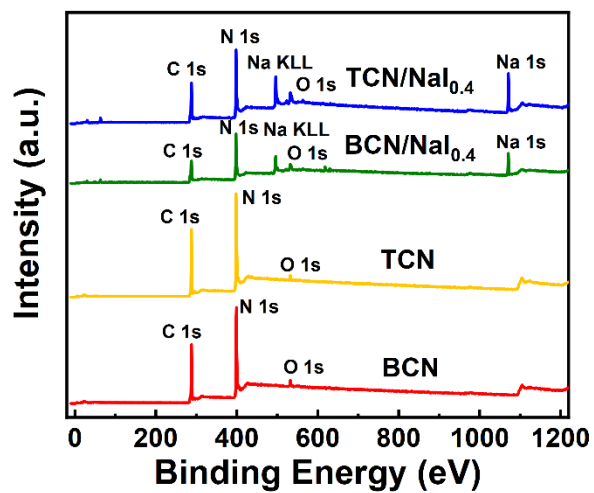

**Figure S2.** XPS survey spectra of BCN, TCN, BCN/NaI<sub>0.4</sub> and TCN/NaI<sub>0.4</sub>.

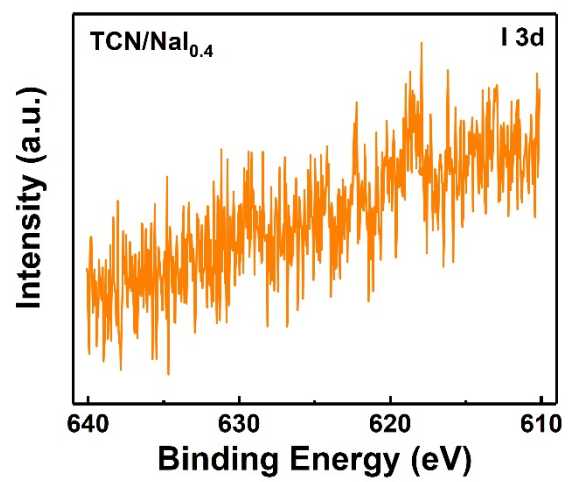

**Figure S3.** XPS spectra I 3d for TCN/NaI<sub>0.4</sub>.

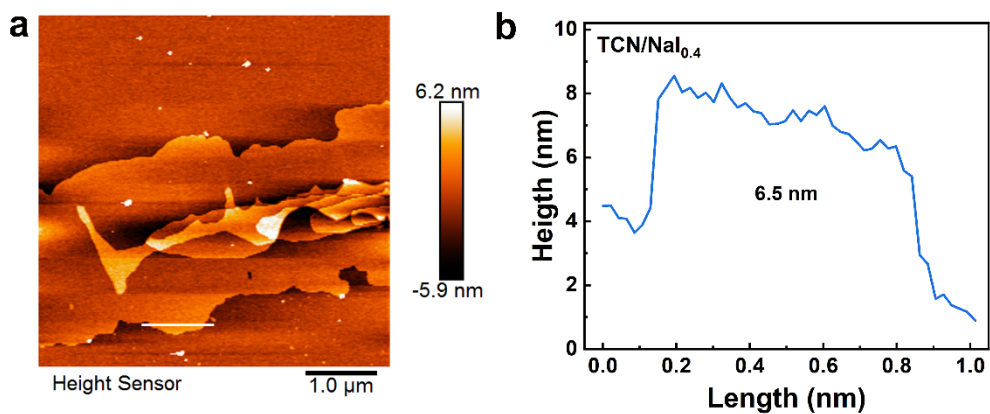

**Fig. S4** (a-b) Typical AFM images and the height profile along the line in AFM of TCN/NaI<sub>0.4</sub>.



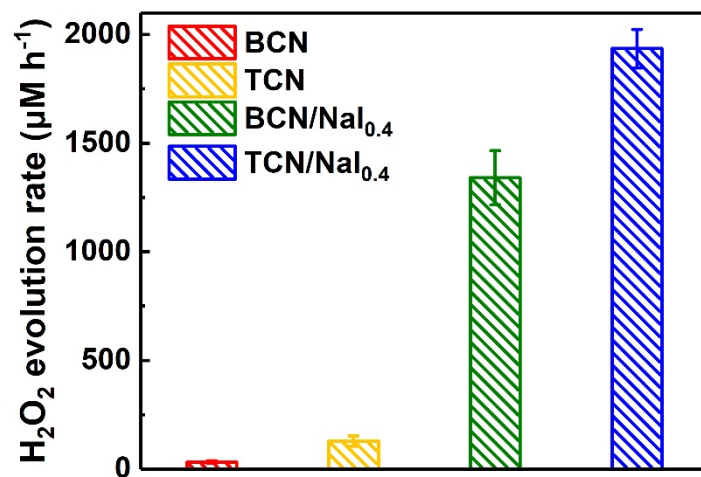

**Figure S5.** Histogram of H<sub>2</sub>O<sub>2</sub> production for BCN, TCN, BCN/NaI<sub>0.4</sub> and TCN/NaI<sub>0.4</sub>.

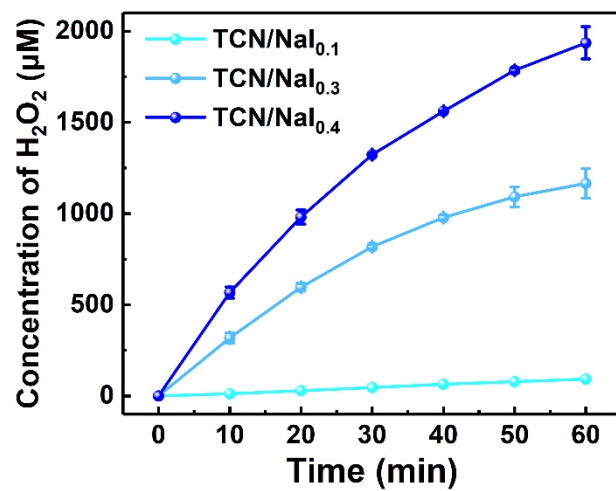

**Figure S6.** Time profiles of H<sub>2</sub>O<sub>2</sub> production for TCN/NaI<sub>0.4</sub>, TCN/NaI<sub>0.3</sub>, TCN/NaI<sub>0.1</sub> under visible light irradiation.

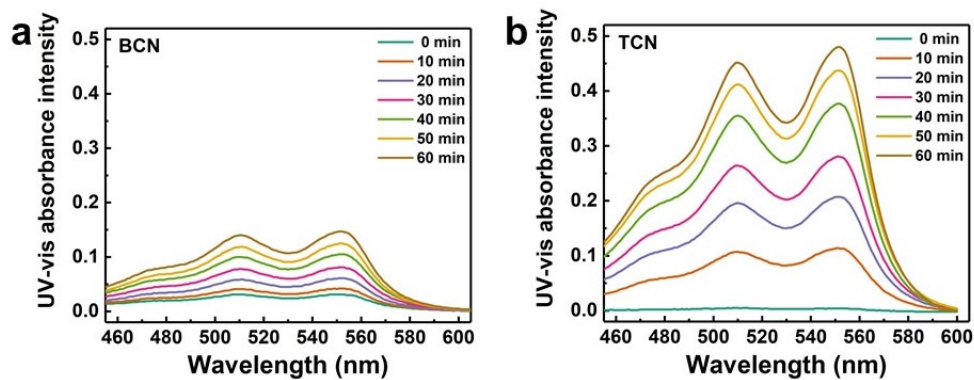

**Figure S7.** UV-vis absorption spectra of  $\text{H}_2\text{O}_2$  produced with IPA in photocatalytic stage of (a) BCN and (b) TCN at different times.

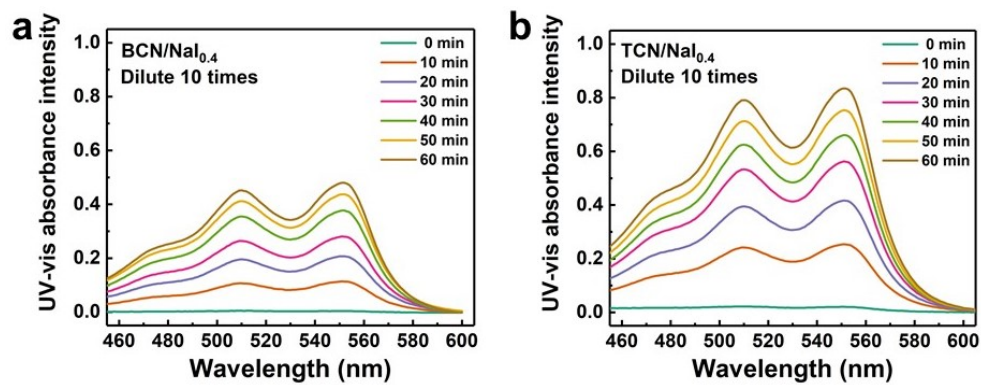

**Figure S8.** UV-vis absorption spectra of H<sub>2</sub>O<sub>2</sub> produced with IPA in photocatalytic stage of (a) BCN/NaI<sub>0.4</sub> and (b) TCN/NaI<sub>0.4</sub> at different times.

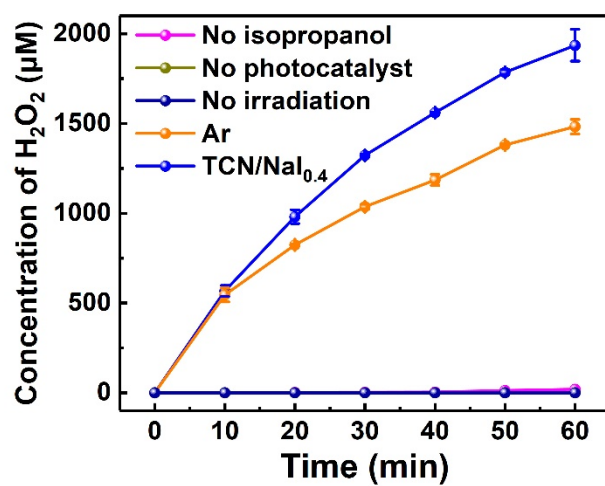

**Figure S9.** Photocatalytic H<sub>2</sub>O<sub>2</sub> production activity of TCN/NaI<sub>0.4</sub> under different conditions.

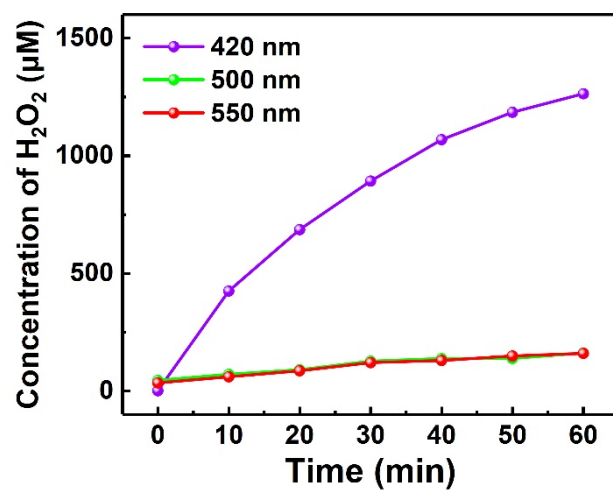

**Figure S10.** Photocatalytic H<sub>2</sub>O<sub>2</sub> production activity of TCN/NaI<sub>0.4</sub> under 420nm, 500nm, 550nm light irradiation.

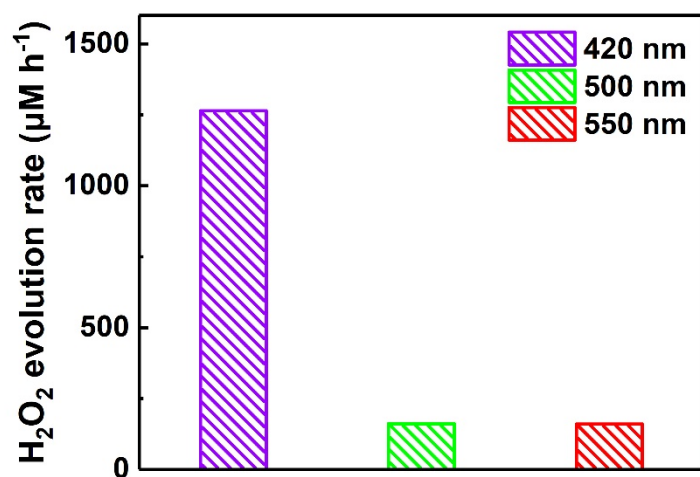

**Figure S11.** Histogram of H<sub>2</sub>O<sub>2</sub> production for TCN/NaI<sub>0.4</sub> under 420nm, 500nm, 550nm light irradiation.

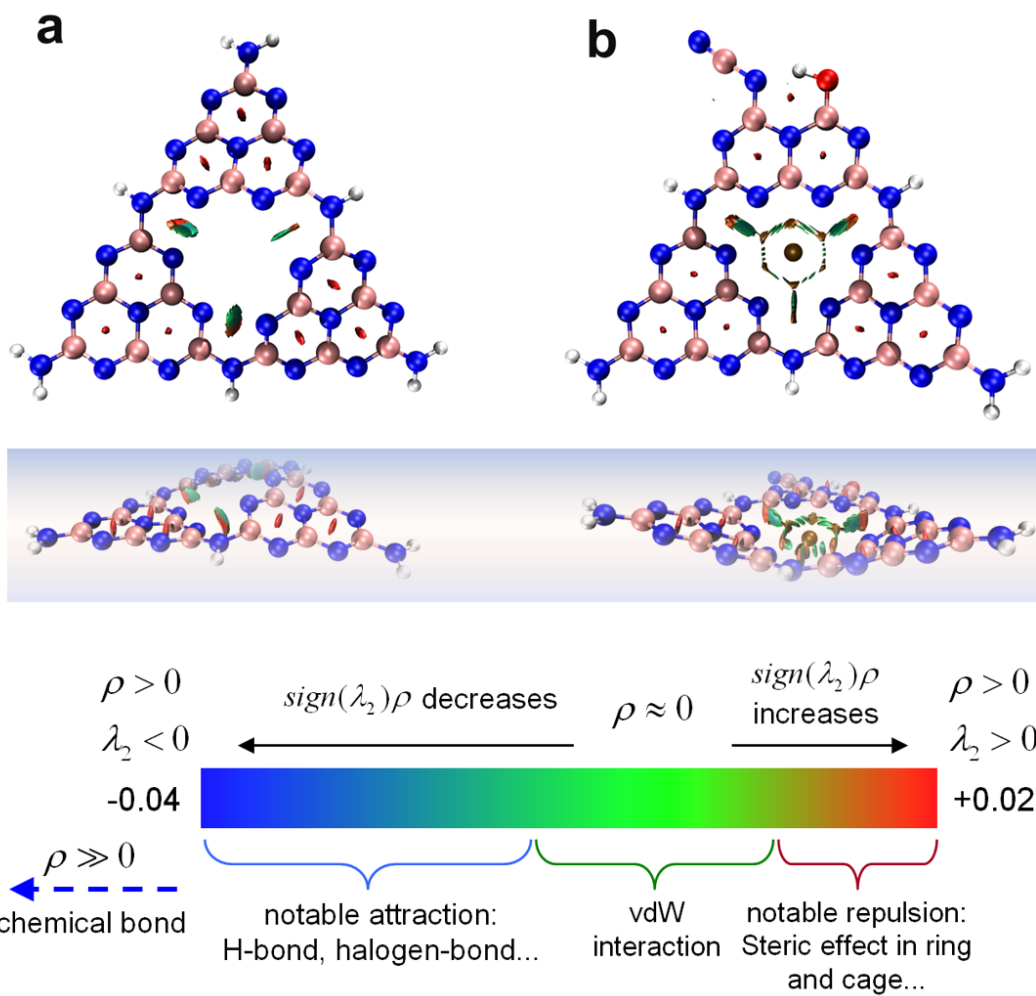

**Figure S12.** Isosurface map of IRI of pure BCN and TCN/NaI.



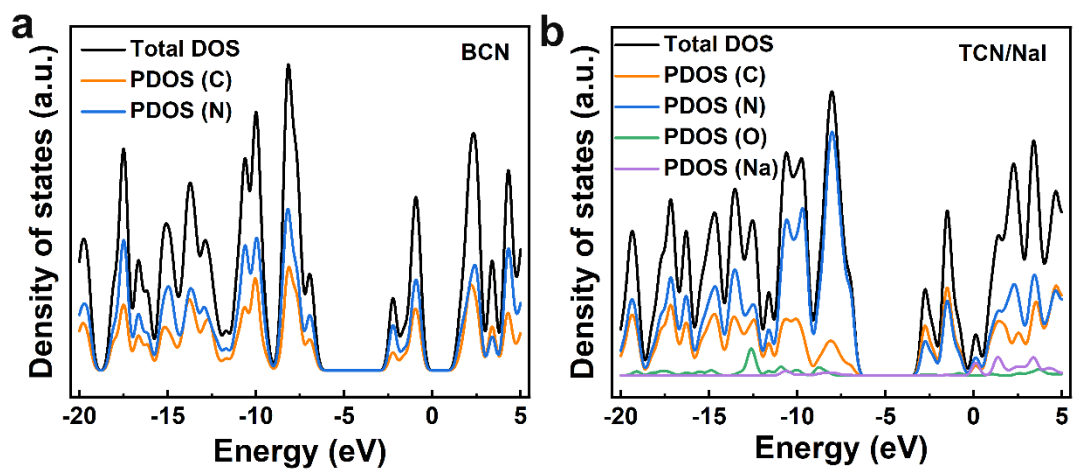

**Figure S13.** Total density of states (DOS) and partial density of states (PDOS) of pure BCN and TCN/NaI.

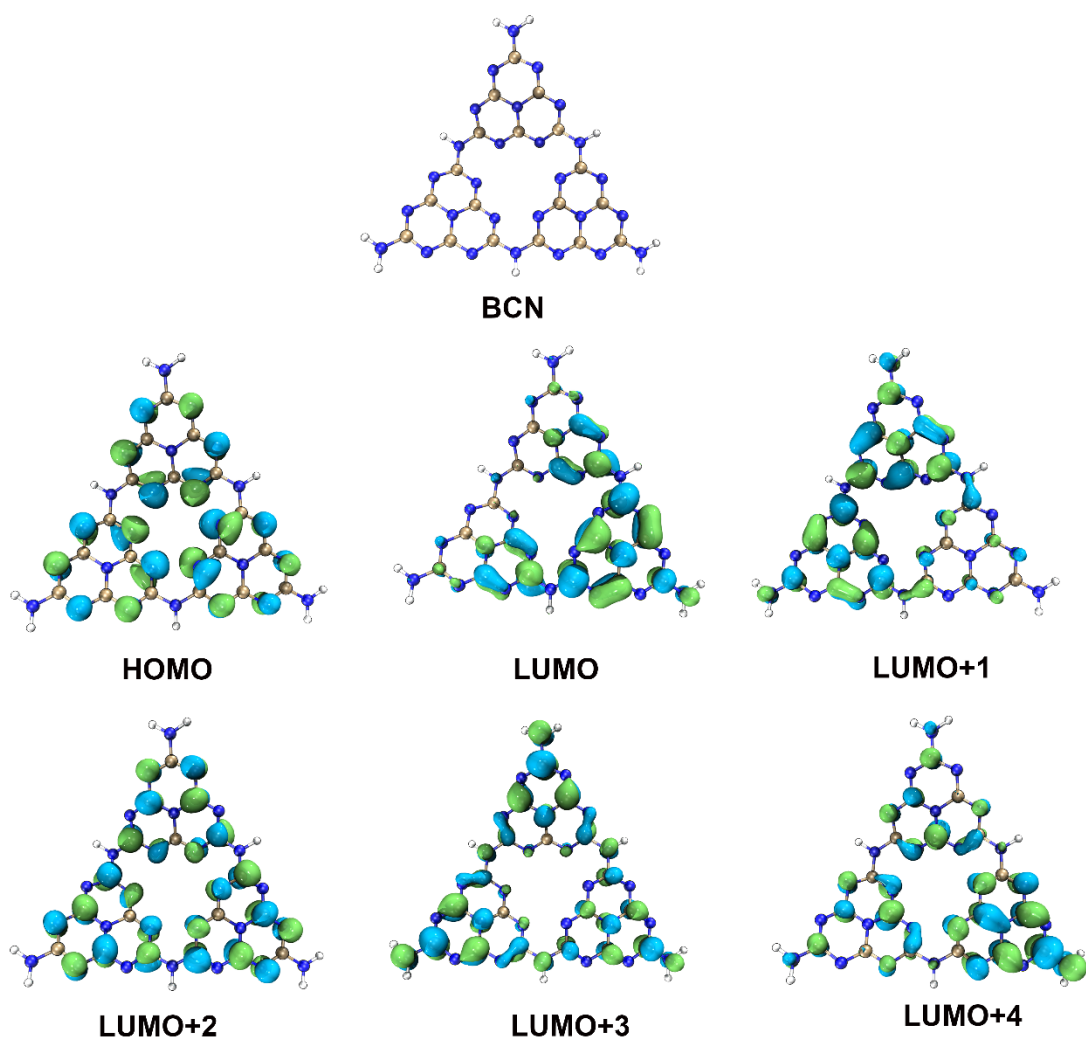

**Figure S14.** Electronic structure of the optimized HOMO and LUMO of pure BCN. Green and blue isosurfaces represent electron and hole distributions, respectively. The isosurface value is  $0.003 \text{ e}/\text{\AA}^3$ .

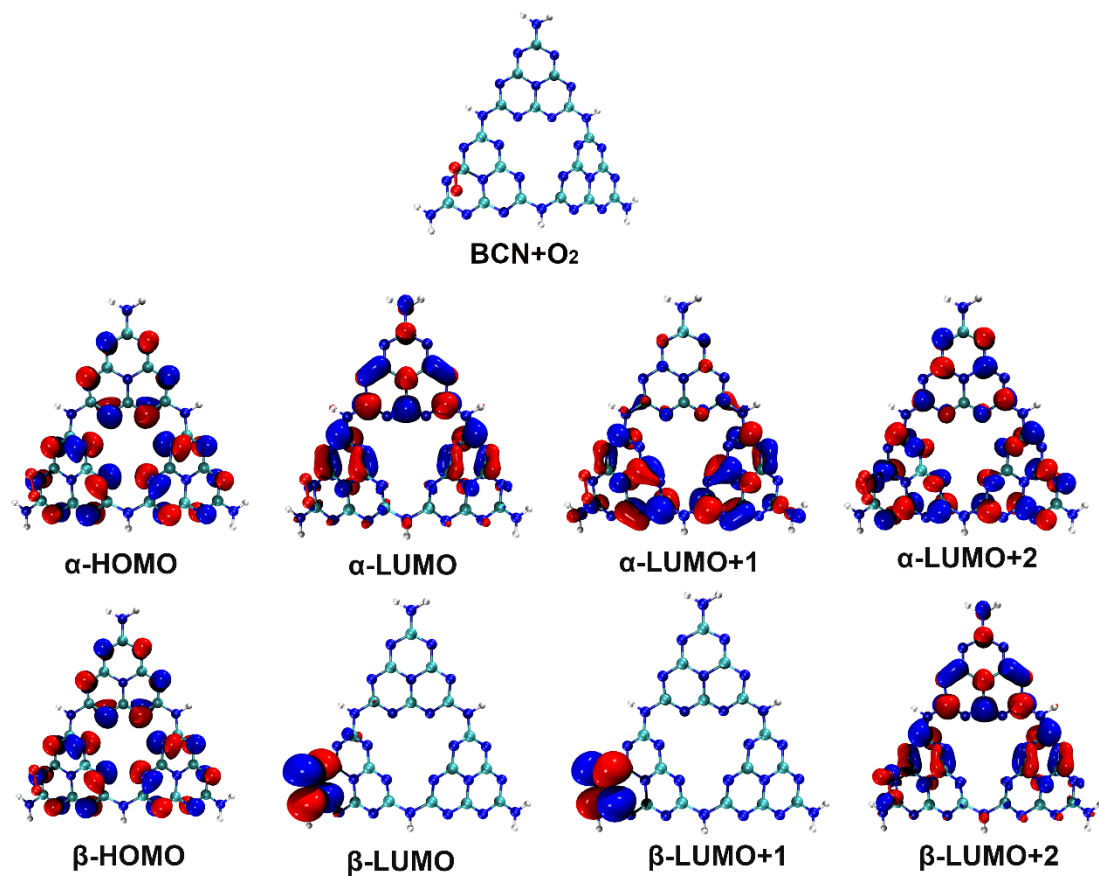

**Figure S15.** Electronic structure of the optimized HOMO and LUMO of O<sub>2</sub> adsorbed BCN. Red and blue isosurfaces represent electron and hole distributions, respectively. The isosurface value is 0.003 e/Å<sup>3</sup>.

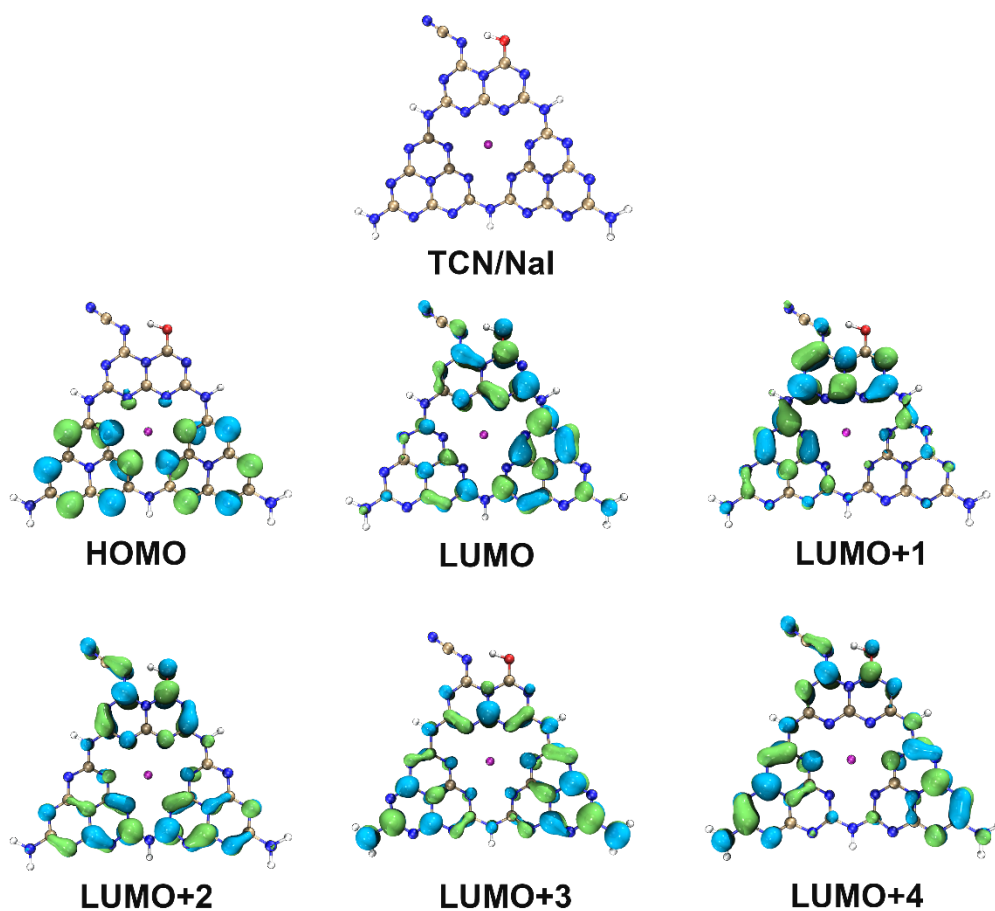

**Figure S16.** Electronic structure of the optimized HOMO and LUMO of TCN/NaI. Green and blue isosurfaces represent electron and hole distributions, respectively. The isosurface value is  $0.003 \text{ e}/\text{\AA}^3$ .

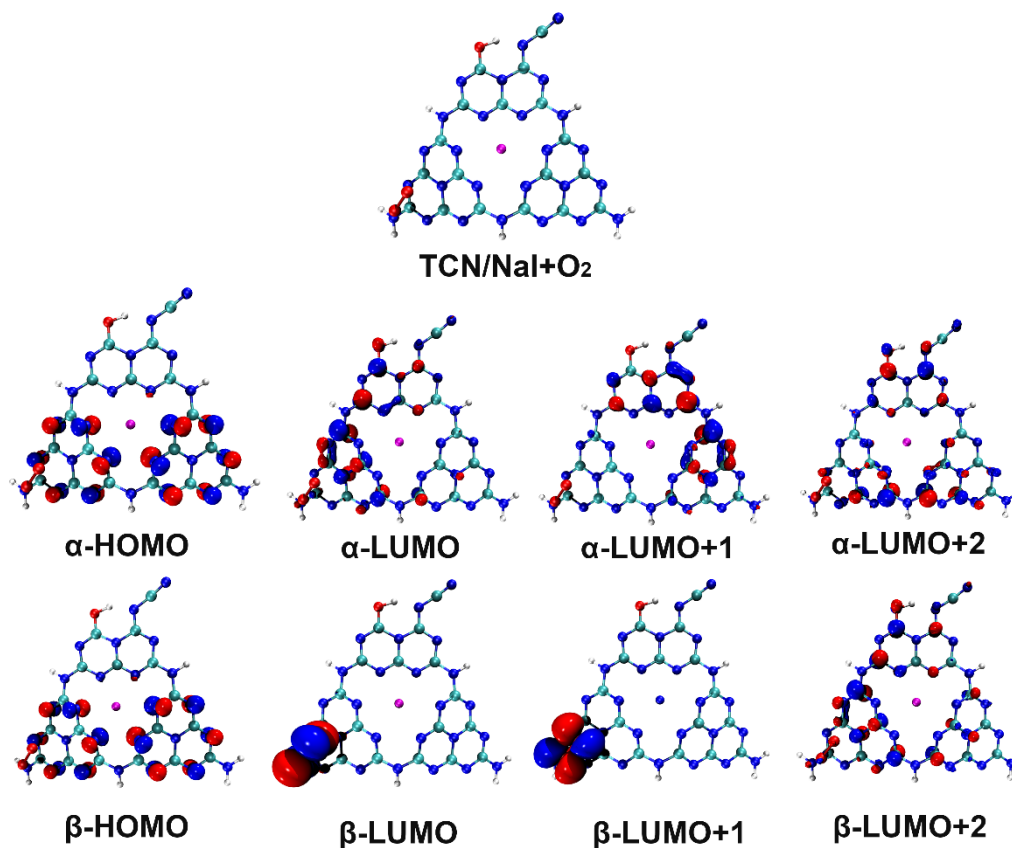

**Figure S17.** Electronic structure of the optimized HOMO and LUMO of O<sub>2</sub> adsorbed TCN/NaI. Red and blue isosurfaces represent electron and hole distributions, respectively. The isosurface value is 0.003 e/Å<sup>3</sup>.

## References

- 1 C. Adamo, V. Barone, *J. Chem. Phys.* 1999, **110**, 6158-6170.
- 2 S. Grimme, S. Ehrlich, L. Goerigk, *J. Comput. Chem.* 2011, **32**, 1456-1465.
- 3 S. Grimme, J. Antony, S. Ehrlich, H. Krieg, *J. Chem. Phys.* 2010, **132**, 154104-154122.
- 4 R. Ditchfield, W. J. Hehre, J. A. Pople, *J. Chem. Phys.* 1971, **54**, 724-728.
- 5 M. J. Frisch, G. W. Trucks, H. B. Schlegel, G. E. Scuseria, M. A. Robb, J. R. Cheeseman, G. Scalmani, V. Barone, G. A. Petersson, H. Nakatsuji, Gaussian 16, Revision C.01. Fox, Gaussian, Inc., Wallingford CT (2019).
- 6 A. V. Marenich, C. J. Cramer, D. G. Truhlar, *J. Phys. Chem. B* 2009, **113**, 6378-6396.
- 7 F. Weigend, R. Ahlrichs, *Phys. Chem. Chem. Phys.* 2005, **7**, 3297-3305.

- 8 P. W. Ayers, R. G. Parr, *J. Am. Chem. Soc.* 2000, **122**, 2010-2018.
- 9 P. Fuentealba, P. Pérez, R. Contreras, *J. Chem. Phys.* 2000, **113**, 2544-2551.
- 10 T. Lu, Q. Chen, *Chemistry-Methods*, 2021, **1**, 231-239.
- 11 Z. Liu, T. Lu, Q. Chen, *Carbon* 2020, **165**, 461-467.
- 12 T. Lu, F. Chen, *J. Comput. Chem.* 2012, **33**, 580-592.
- 13 W. Humphrey, A. Dalke, K. Schulten, *J. Molec. Graphics.* 1996, **14**, 33-38.
- 14 L. Goerigk, S. Grimme, *J. Chem. Theor. Comput.* 2010, **7**, 291-309.
